# Supplementary material for: PLS2 in Metabolomics
Source: PubMed Central journal article supplement (PMC6468483; doi:10.3390/metabo9030051), 2019-03-15
Supplement: metabolites-09-00051-s001.pdf [file metabolites-09-00051-s001.pdf]

# Supplementary Materials:

## PLS2 IN METABOLOMICS

Matteo Stocchero, Emanuela Locci, Ernesto d'Aloja, Matteo Nioi, Eugenio Baraldi and Giuseppe Giordano

### Basic R-functions

### PLS2 and ptPLS2

Input: matrix X of the predictors, matrix Y of the responses, number A of latent variables of the model.

Output: score matrix T, score matrix of the post-transformed model Tpt, weight matrix W, matrix Wstar (W\*), matrix of the regression coefficient B.

```

PLS2<-function(X,Y,A) {
  W<-matrix(rep(0,A*ncol(X)),nrow=ncol(X),ncol=A)
  P<-matrix(rep(0,A*ncol(X)),nrow=ncol(X),ncol=A)
  T<-matrix(rep(0,A*nrow(X)),nrow=nrow(X),ncol=A)
  E<-X
  for (i in 1:A) {
    W[,i]<-svd(t(Y)%*%E)$v[,1]
    T[,i]<-E%*%W[,i]
    P[,i]<-t(E)%*%T[,i]/sum(T[,i]*T[,i])
    E<-E-T[,i]%*%t(P[,i])
  }
  Ws<-W%*%solve(t(P)%*%W)
  B<-Ws%*%solve(t(T)%*%T)%*%t(T)%*%Y
  d1<-svd(t(Y)%*%X%*%W)
  Np<-length(which(d1$d>10^-8))
  G<-step.2(X,Y,W)
  if (A<=Np) Tpt<-T
  if (A>Np) Tpt<-step.3(X,Y,W,G)$Tpt
  pls2<-list(T=T,Tpt=Tpt,W=W,Wstar=Ws ,B=B)
  return(pls2)
}

step.2<-function(X,Y,W) {
  G<-matrix(rep(0,ncol(W)*ncol(W)),ncol=ncol(W))
  I<-diag(rep(1,ncol(W)))
  d1<-svd(t(Y)%*%X%*%W)
  N<-length(which(d1$d>10^-8))
  V<-Re(d1$v[,1:N])

```

```

38     d2<-eigen((I-V%*%t(V))%*%(t(W)%*%t(X)%*%X%*%W))
39     M<-length(which(Re(d2$values)>10^-8))
40     Go<-Re(d2$vectors[,1:M])
41     Gp<-Re(eigen(t(I-Go%*%t(Go))%*(I-Go%*%t(Go))) $vectors[,1:(ncol(W)-M)])
42     G<-cbind(Go,Gp)
43     return(G)
44 }
45 step.3<-function(X,Y,W,G) {
46     Tpt<-matrix(rep(0,nrow(X)*ncol(W)),ncol=ncol(W))
47     E<-X
48     F<-Y
49     Wpt<-W%*%G
50     for (i in 1:ncol(W)) {
51         Tpt[,i]<-E%*%Wpt[,i]
52         Q<-Tpt[,i]%*%t(Tpt[,i])/sum(Tpt[,i]^2)
53         E<-E-Q%*%E
54         F<-F-Q%*%F
55     }
56     Ppt<-t(X)%*%Tpt%*%solve(t(Tpt)%*%Tpt)
57     Wspt<-Wpt%*%solve(t(Ppt)%*%Wpt)
58     ptmodel<-list(Tpt=Tpt,Wpt=Wpt,Wspt=Wspt)
59     return(ptmodel)
60 }

```

## 61 oCPLS2

62 Input: matrix X of the predictors, matrix Y of the responses, matrix Z of the constraints, number A of  
63 latent variables of the model.

64 Output: score matrix T, score matrix of the post-transformed model Tpt, weight matrix W, matrix  
65 Wstar (W\*), matrix of the regression coefficient B.

```

66 oCPLS2<-function(X,Y,Z,A) {
67     W<-matrix(rep(0,A*ncol(X)),nrow=ncol(X),ncol=A)
68     P<-matrix(rep(0,A*ncol(X)),nrow=ncol(X),ncol=A)
69     T<-matrix(rep(0,A*nrow(X)),nrow=nrow(X),ncol=A)
70     B<-t(Z)%*%X
71     h<-svd(B)
72     R<-length(which(h$d>10^-8))
73     V<-h$v[,1:R]
74     Q<-diag(rep(1,ncol(X)))-V%*%t(V)
75     E<-X
76     F<-Y
77     for (i in 1:A) {

```

```

78     W[,i]<- svd(t(F)%*%E%*%Q)$v[,1]
79     T[,i]<-E%*%W[,i]
80     P[,i]<-t(E)%*%T[,i]/sum(T[,i]*T[,i])
81     E<-E-T[,i]%*%t(P[,i])
82     F<-F-T[,i]%*%t(T[,i])%*%F/sum(T[,i]*T[,i])
83   }
84   Ws<-W%*%solve(t(P)%*%W)
85   B<-Ws%*%solve(t(T)%*%T)%*%t(T)%*%Y
86   d1<-svd(t(Y)%*%X%*%W)
87   Np<-length(which(d1$d>10^-8))
88   G<-step.2(X,Y,W)
89   if (A<=Np) Tpt<-T
90   if (A>Np) Tpt<-step.3(X,Y,W,G)$Tpt
91   ocpls2<-list(T=T,Tpt=Tpt,W=W,Wstar=Ws,B=B)
92   return(ocpls2)
93 }

```

#### 94 KPLS2

95 Input: matrix X of the predictors, matrix Y of the responses, number A of latent variables of the  
 96 model, (a, b, c) parameters of the polynomial kernel  $k(x,y)=(a(x^c y)+b)^p$ , matrix Xtest of the test set to  
 97 be predicted

98 Output: normalized score matrix Tn, normalized score matrix of the test set Tnpred, calculated  
 99 response Ycalc, predicted response Ypred

```

100 KPLS2<-function(X,Y,A,a,b,p,Xtest) {
101   Tn<-matrix(rep(0,nrow(X)*A),ncol=A)
102   U<-matrix(rep(0,nrow(Y)*A),ncol=A)
103   K<-K.matrix(X,a,b,p)
104   F<-Y
105   for (i in 1:A) {
106     Tn[,i]<-Re(eigen(K%*%F%*%t(F))$vectors[,1])
107     U[,i]<-F%*%t(F)%*%Tn[,i]
108     Q<-diag(1,nrow(X))-Tn[,i]%*%t(Tn[,i])
109     K<-Q%*%K%*%Q
110     F<-Q%*%F
111   }
112   Ymod<-Y-F
113   K<-K.matrix(X,a,b,p)
114   Kp<-K.matrixpred(Xtest,X,a,b,p)
115   Ypred<-Kp%*%U%*%solve(t(Tn)%*%K%*%U)%*%t(Tn)%*%Y
116   Tnpred<-Kp%*%U%*%solve(t(Tn)%*%K%*%U)
117   r<-list(Tn=Tn ,Tnpred=Tnpred, Ycalc=Ymod,Ypred=Ypred)
118   return(r)

```

```
119 }
120 K.matrix<-function(X,a,b,p) {
121     Km<-matrix(rep(-999,nrow(X)*nrow(X)),nrow=nrow(X))
122     for (i in 1:nrow(X)) {
123         for (j in 1:nrow(X)) {
124             Km[i,j]<-(a*t(X[i,])%*%X[j,]+b)^p
125         }
126     }
127     p<-matrix(rep(1,nrow(X)),ncol=1)
128     Qc<-diag(1,nrow(X))-(1/nrow(X))*p%*%t(p)
129     Km<-Qc%*%Km%*%Qc
130     return(Km)
131 }
132 K.matrixpred<-function(X1,X2,a,b,p) {
133     Kp<-matrix(rep(-999,nrow(X1)*nrow(X2)),nrow=nrow(X1))
134     K<-matrix(rep(-999,nrow(X2)*nrow(X2)),nrow=nrow(X2))
135     for (i in 1:nrow(X1)) {
136         for (j in 1:nrow(X2)) {
137             Kp[i,j]<-(a*t(X1[i,])%*%X2[j,]+b)^p
138         }
139     }
140     for (i in 1:nrow(X2)) {
141         for (j in 1:nrow(X2)) {
142             K[i,j]<-(a*t(X2[i,])%*%X2[j,]+b)^p
143         }
144     }
145     p<-matrix(rep(1,nrow(X2)),ncol=1)
146     pp<-matrix(rep(1,nrow(X1)),ncol=1)
147     Qc<-diag(1,nrow(X2))-(1/nrow(X2))*p%*%t(p)
148     P<-(1/nrow(X2))*pp%*%t(p)
149     Kp<-(Kp-P%*%K)%*%Qc
150     return(Kp)
151 }
```
